# Supplementary material for: Monitoring potential ionospheric changes caused by Van earthquake (Mw 7.2)
Source: Copernicus journal article supplement (doi:10.5194/angeo-2018-105), 2018-09-24
Supplement: Supplementary file [file angeo-2018-105-AC2-supplement.pdf]

## **RESPONSE TO REVIEWER 1**

Thank you for your valuable comments. We have edited Page 2 paragraph 2 line 1, Page 2 last paragraph, and conclusion paragraph 1 line 6 as you suggest.
