# Supplementary material for: Monitoring potential ionospheric changes caused by Van earthquake (Mw 7.2)
Source: Copernicus journal article supplement (doi:10.5194/angeo-2018-105), 2018-09-24
Supplement: Supplementary file [file angeo-2018-105-AC3-supplement.pdf]

## RESPONSE TO REVIEWER 2

Thank you for your valuable comments. We have organized our paper as you suggest.

- 1- You suggest that figure 3-10 and table 1-10 are similar and therefore one gps station is enough to analyze. We have analyzed one gps station which is nearest receiver epicenter of earthquake.
- 2- You have also suggest that teporal and spatial resolution should be taken into account using GIM model. Therefore we have analyzed spatial and temporal analysis as you state
- 3- Discussion section was given as you suggest. Other conclusions were discussed and compared our results.
- 4- Line 41, line 45, line43-45, 48-50, 57-59 were defined repeatedly
- 5- Line 95 reference was added, line 111 x and y axis and caption was again drawn as you state.
- 6- Equation 2 was edited correctly.
- 7- Fig 2 was drawn again as you state.
- 8- Line 148-149, 164-165, 185-186, 202-203 was organized again.
